# Supplementary figures and images for: Ginsenoside Rb2 exhibits therapeutic value for male osteoporosis in orchiectomy mice by suppressing osteoclastogenesis and modulating NF-κB/MAPK signaling pathways
Source: Royal Society of Chemistry journal article supplement (doi:10.1039/d3fo04334g), 2024-01-01

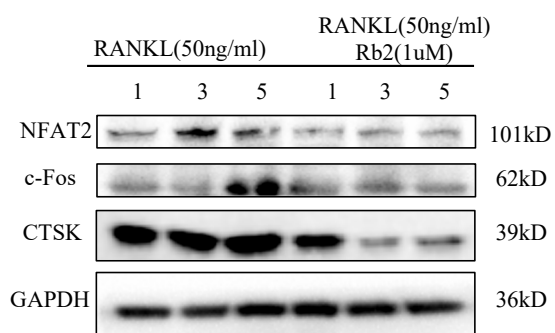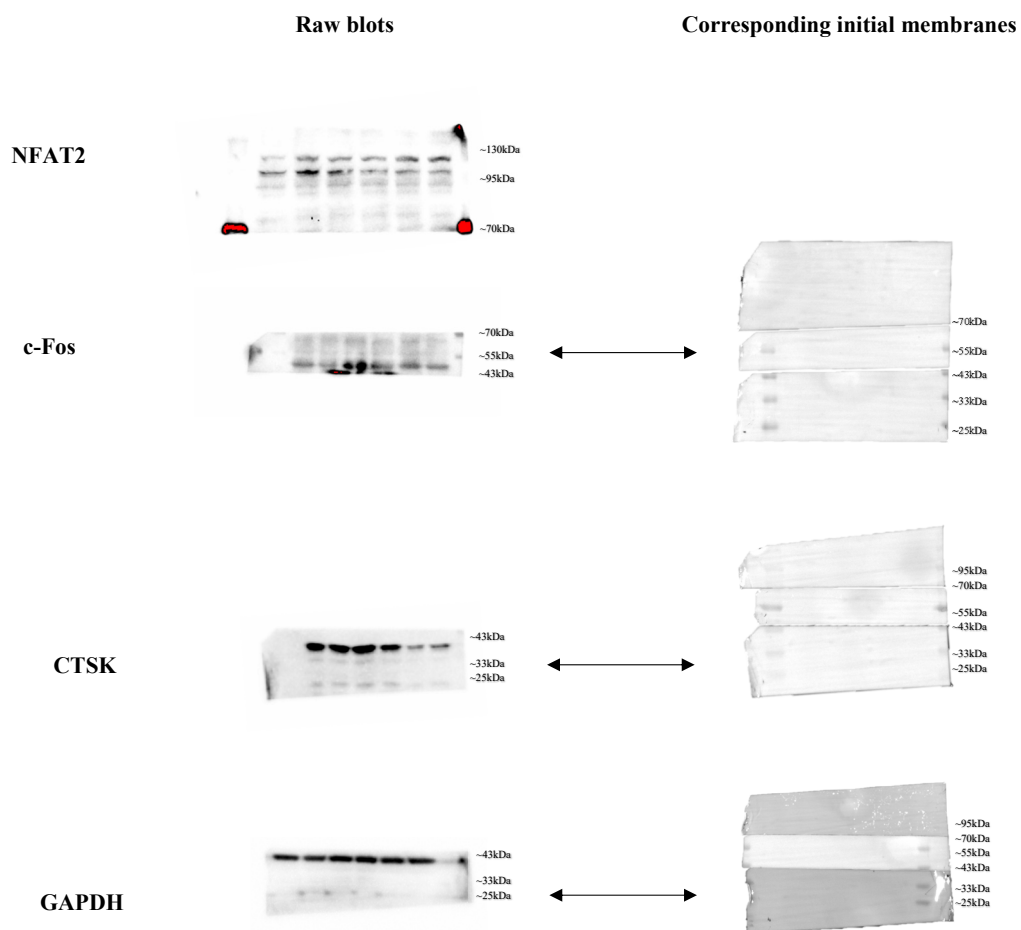

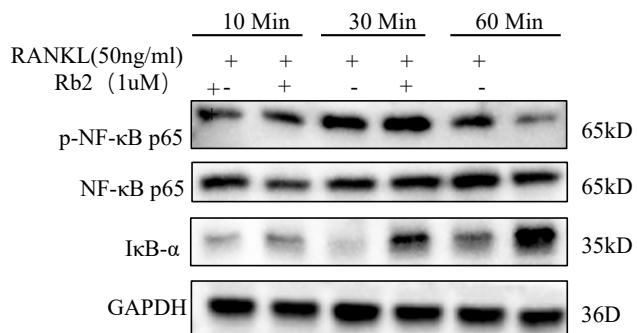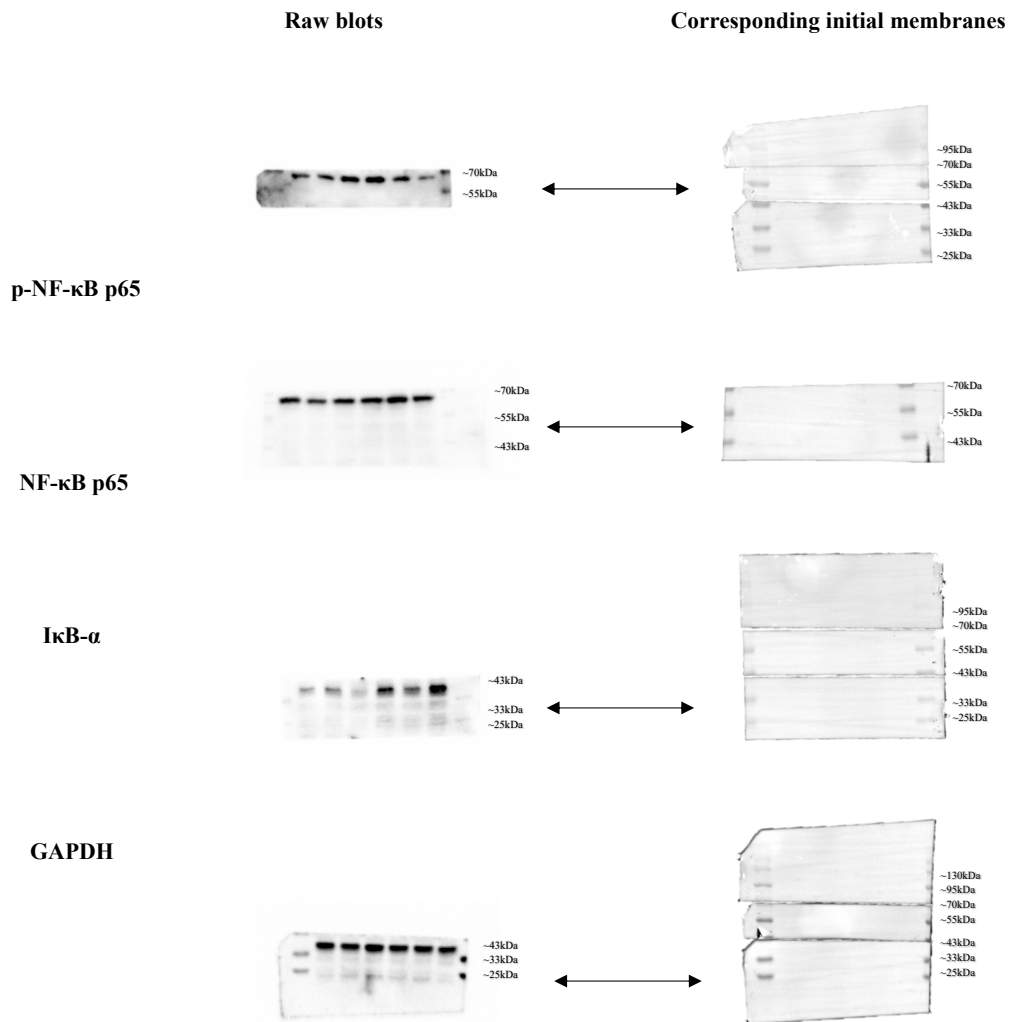

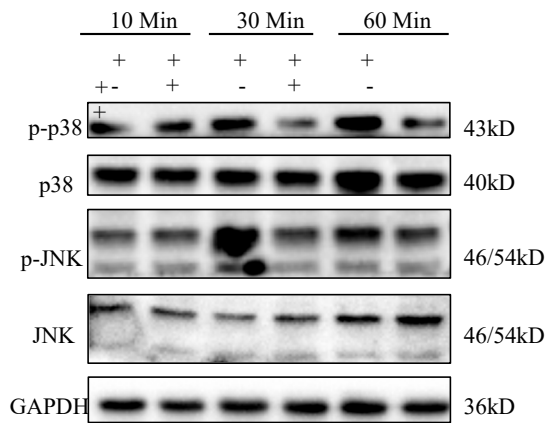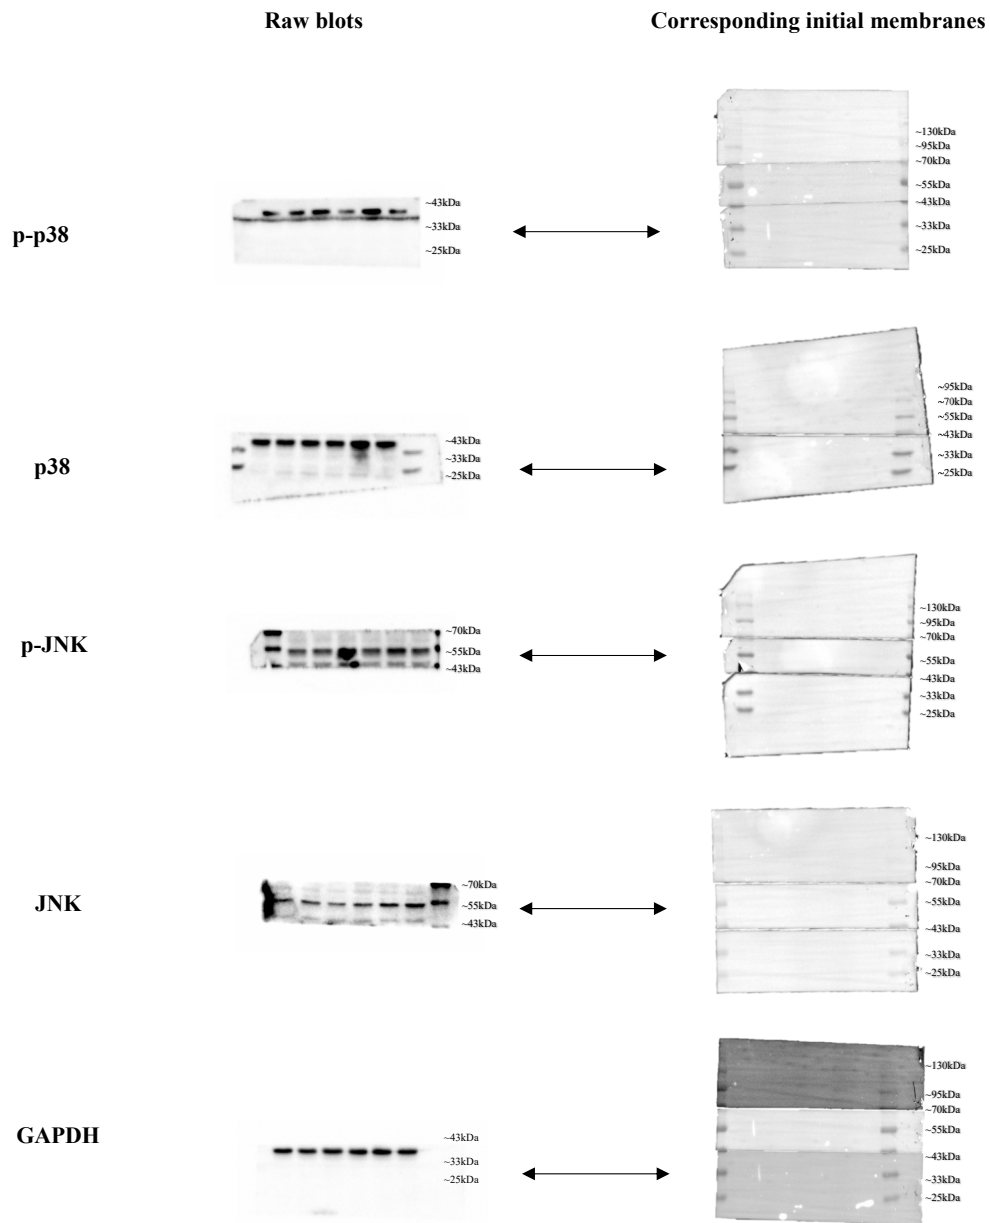

Supplement: d3fo04334g1.pdf [file d3fo04334g1.pdf]
